# Supplementary material for: Evaluating neural encoding of prosody in emotional speech using the speech FFR in normal-hearing adults
Source: Research Square preprint supplement (doi:10.21203/rs.3.rs-7031274/v1), 2025-09-22
Supplement: Supplementary file 1 [file 98bf85125948614842b49e0e.pdf]

Figure S1. Spectrograms with overlaid F0 contours extracted from the stimulus waveform (green curves) and evoked FFR (blue curves) are shown for each participant (n=16) across the four experimental conditions: male talker and sad emotion (A), male talker and happy emotion (B), female talker and sad emotion (c), and female talker and happy emotion (D).

## Participant 1

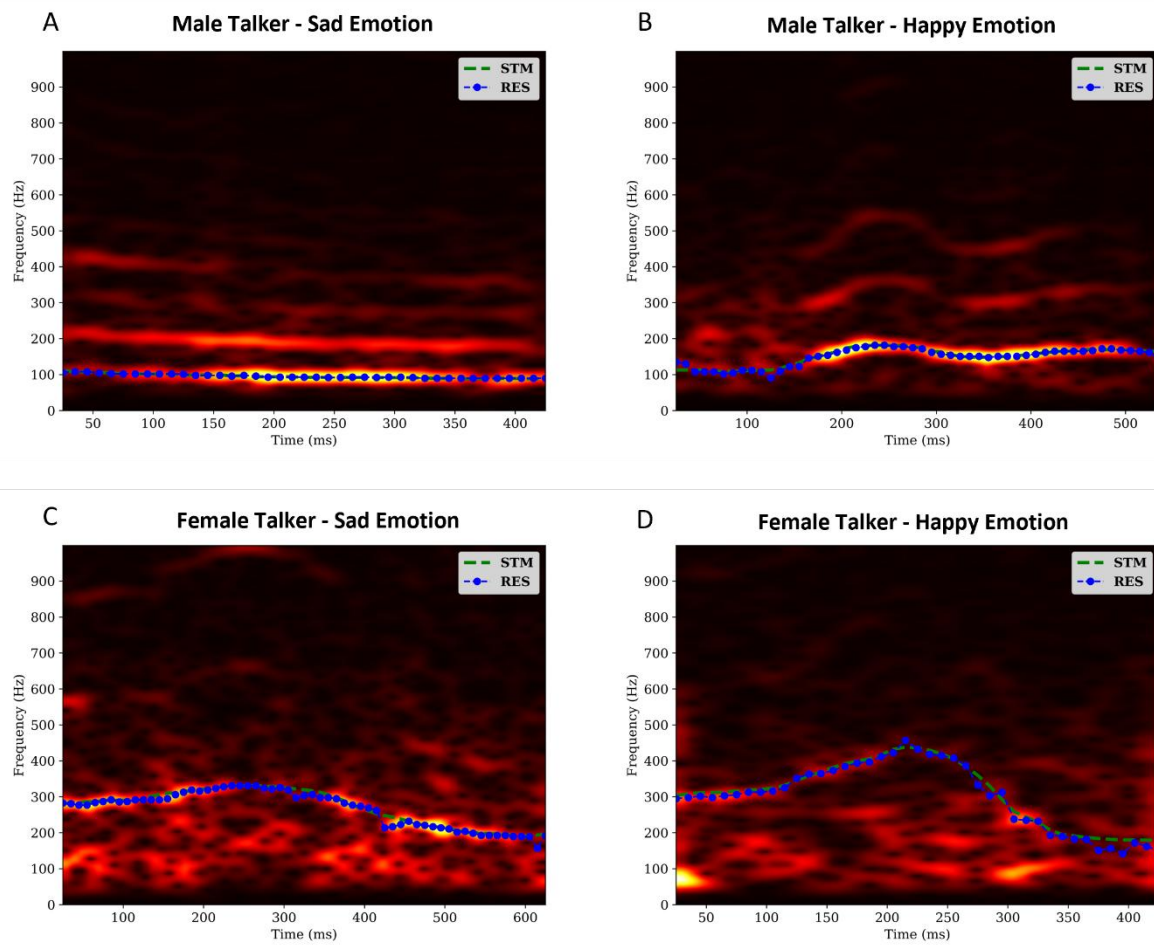

## Participant 2

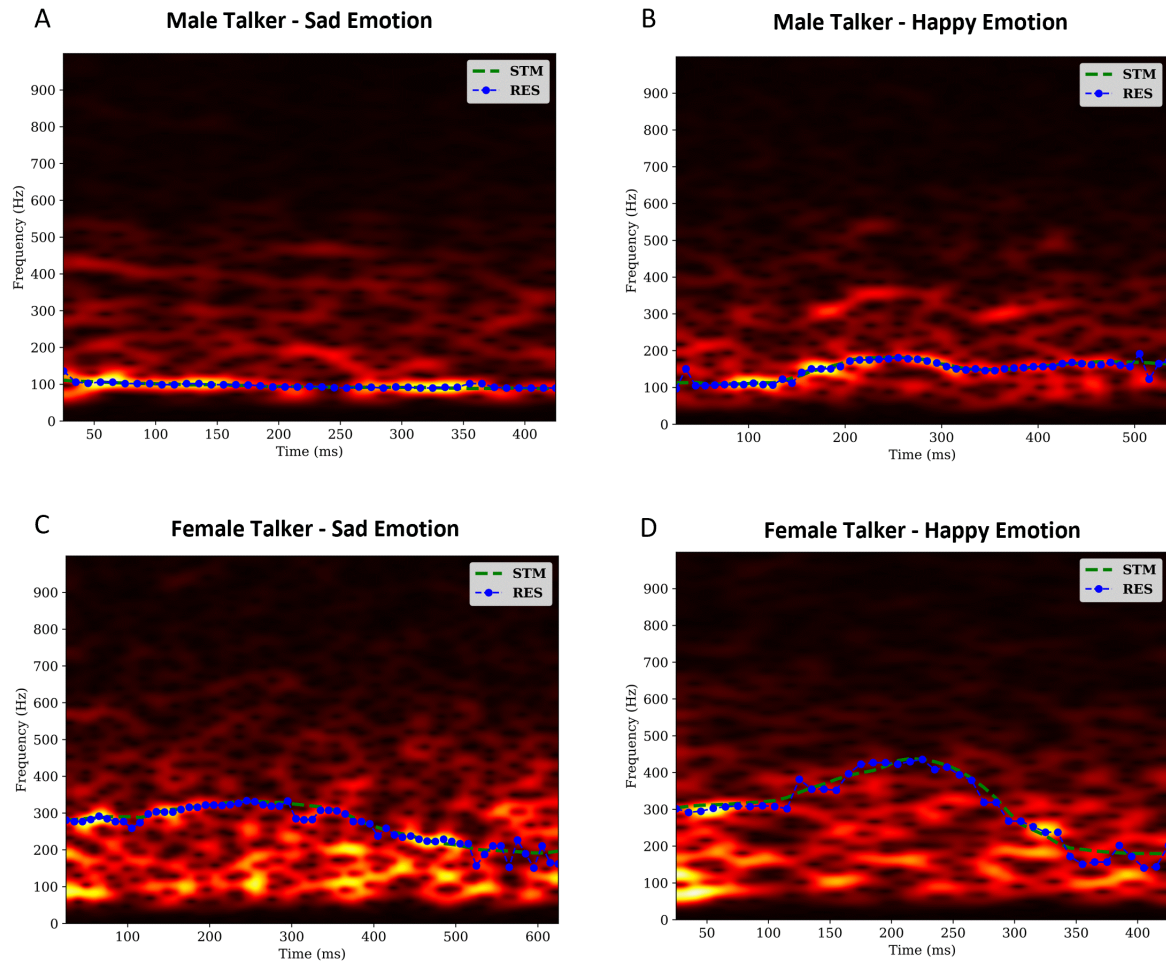

## Participant 3

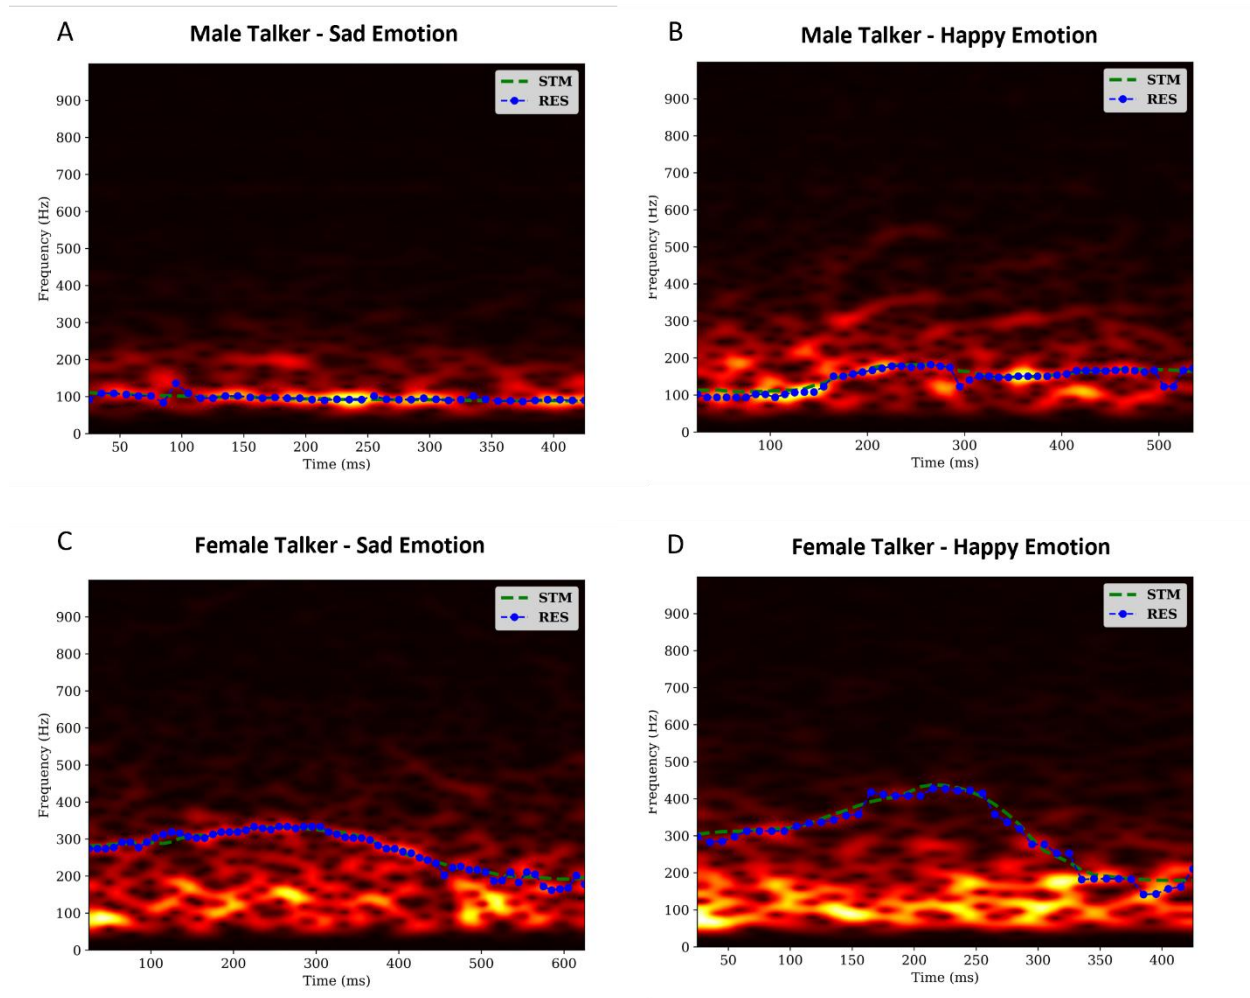

Participant 4

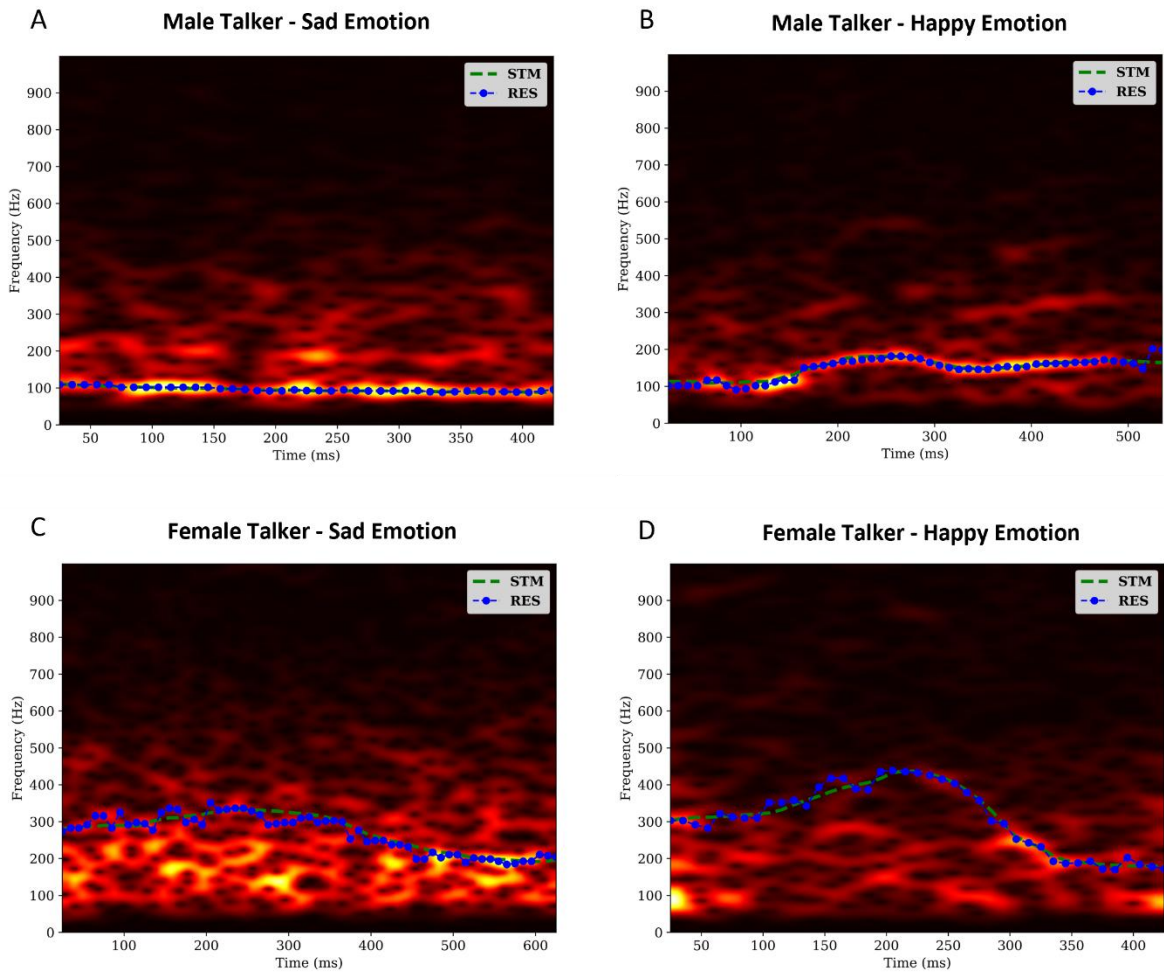

## Participant 5

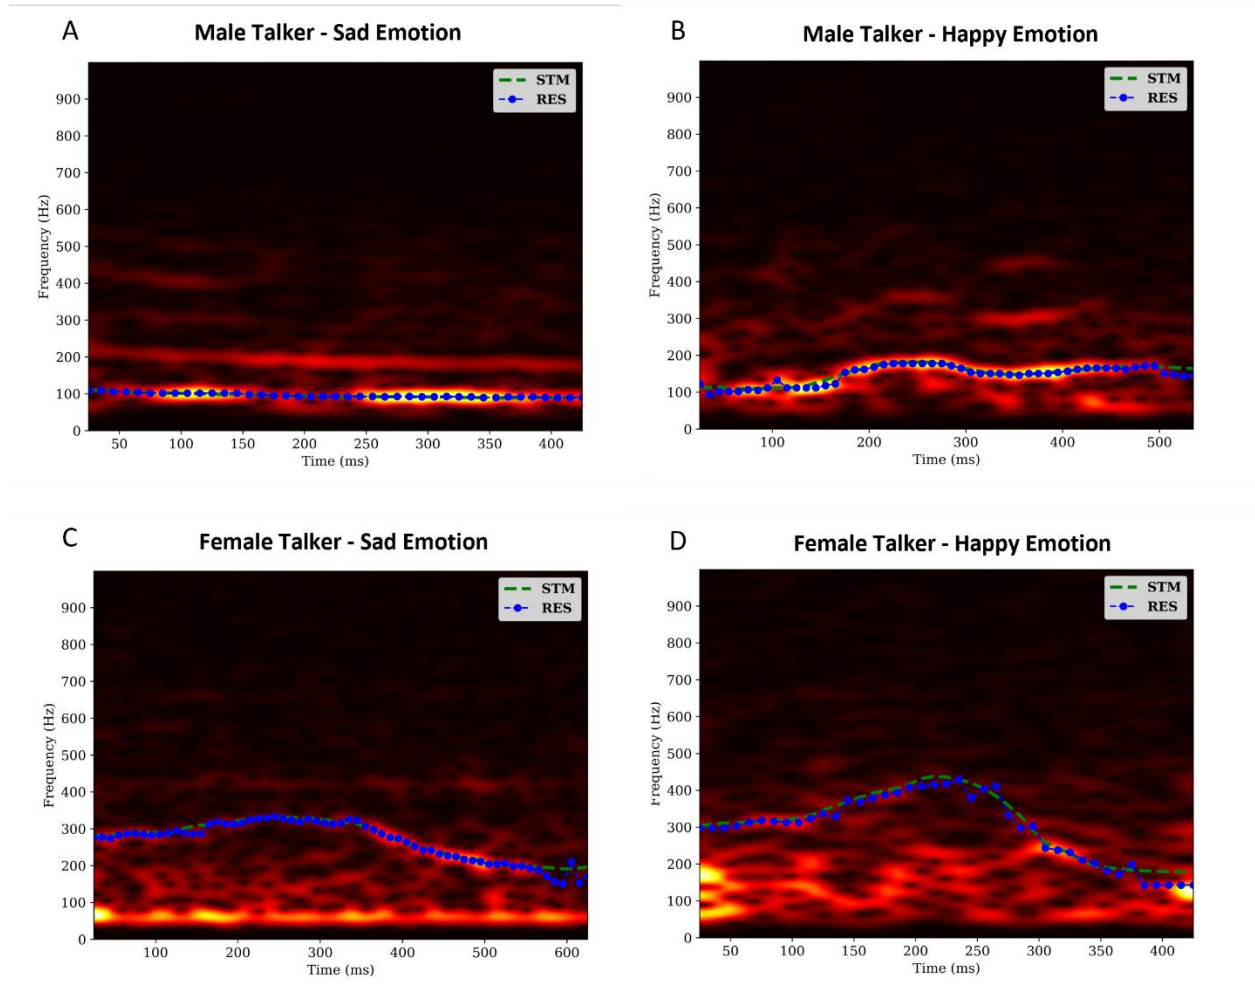

## Participant 6

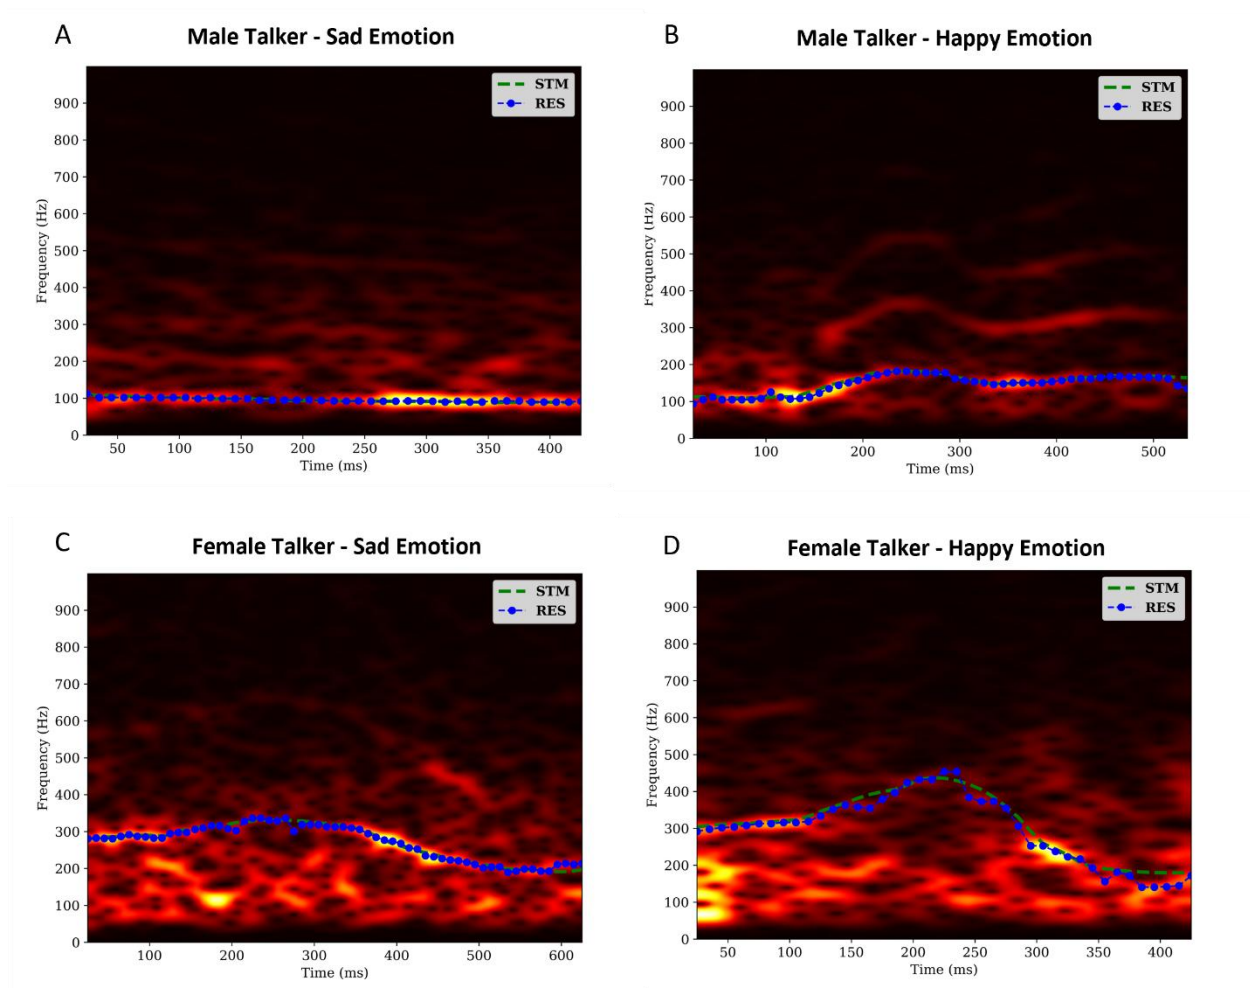

## Participant 7

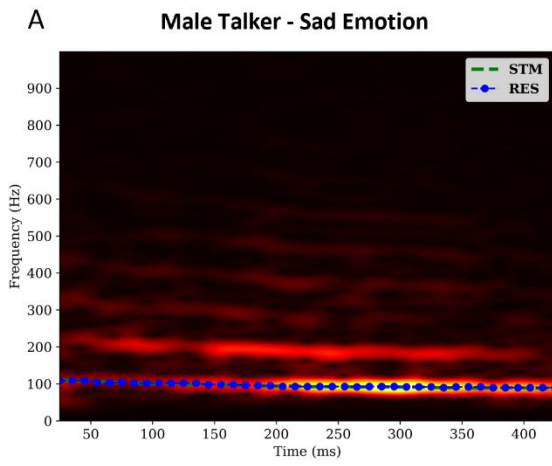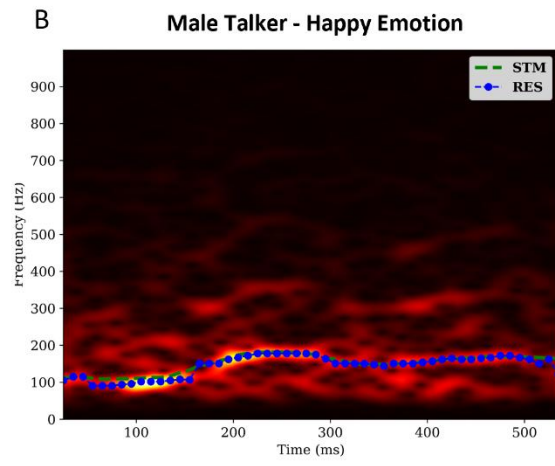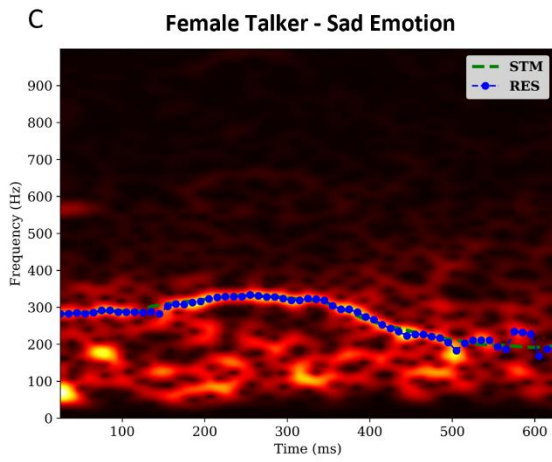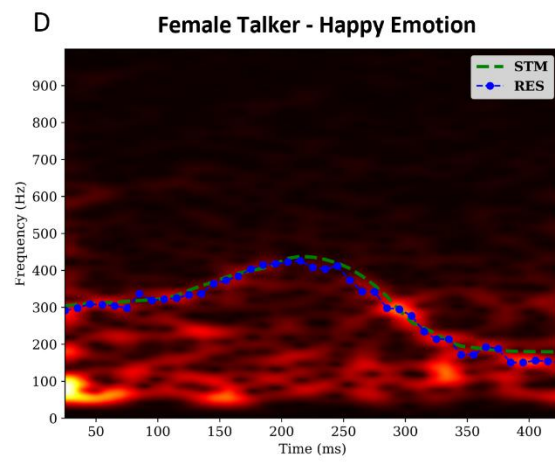

## Participant 8

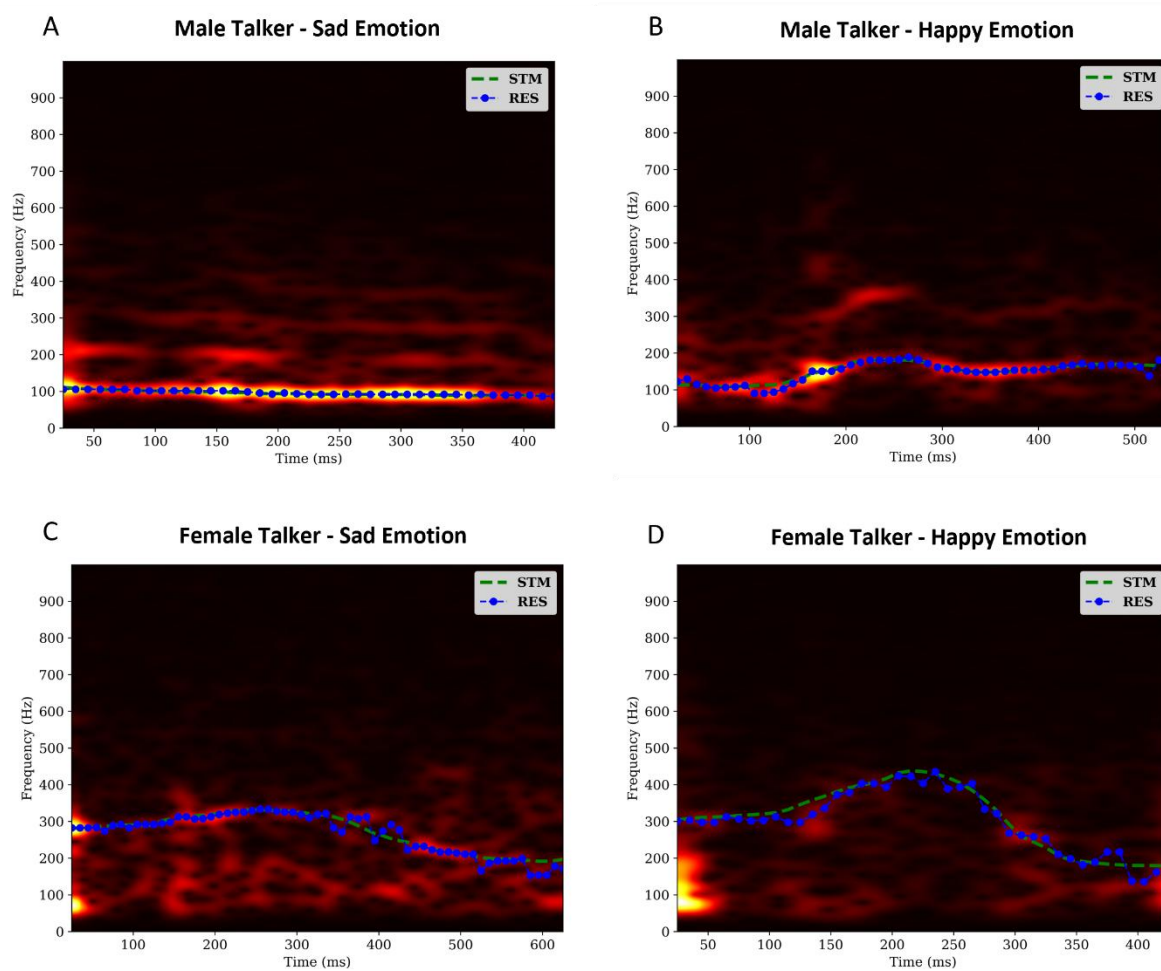

## Participant 9

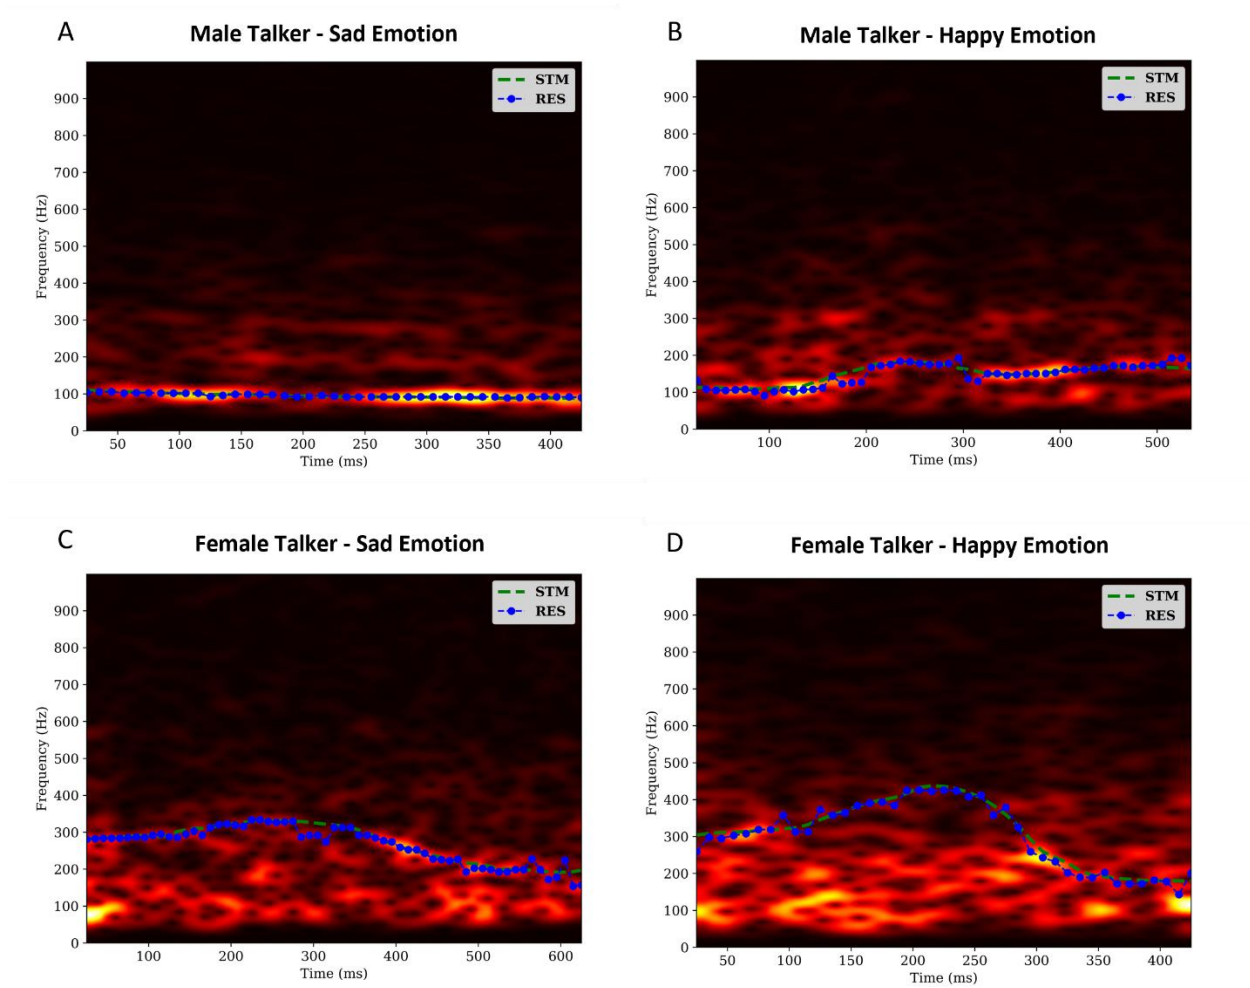

Participant 10

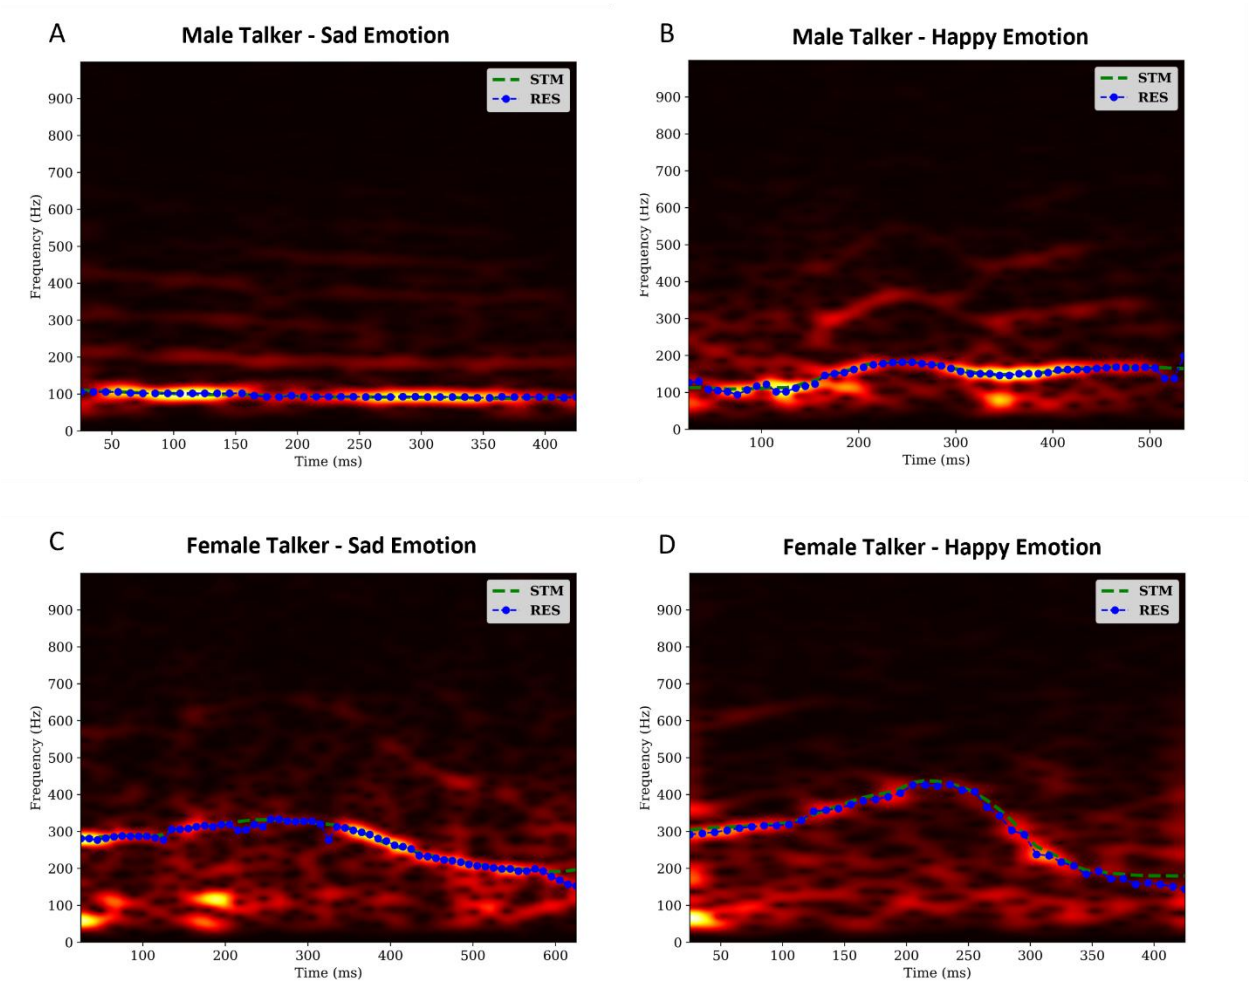

## Participant 11

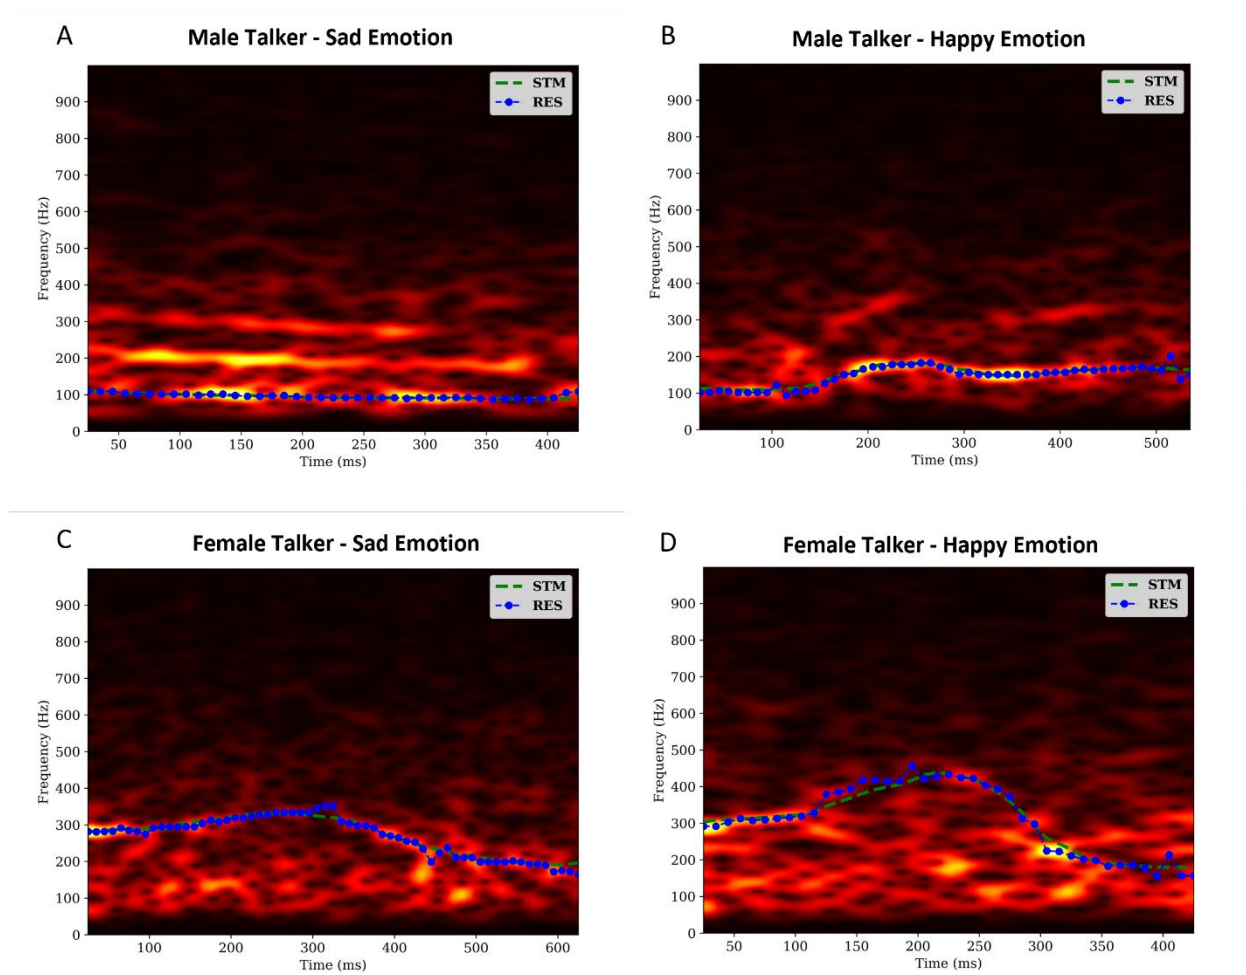

## Participant 12

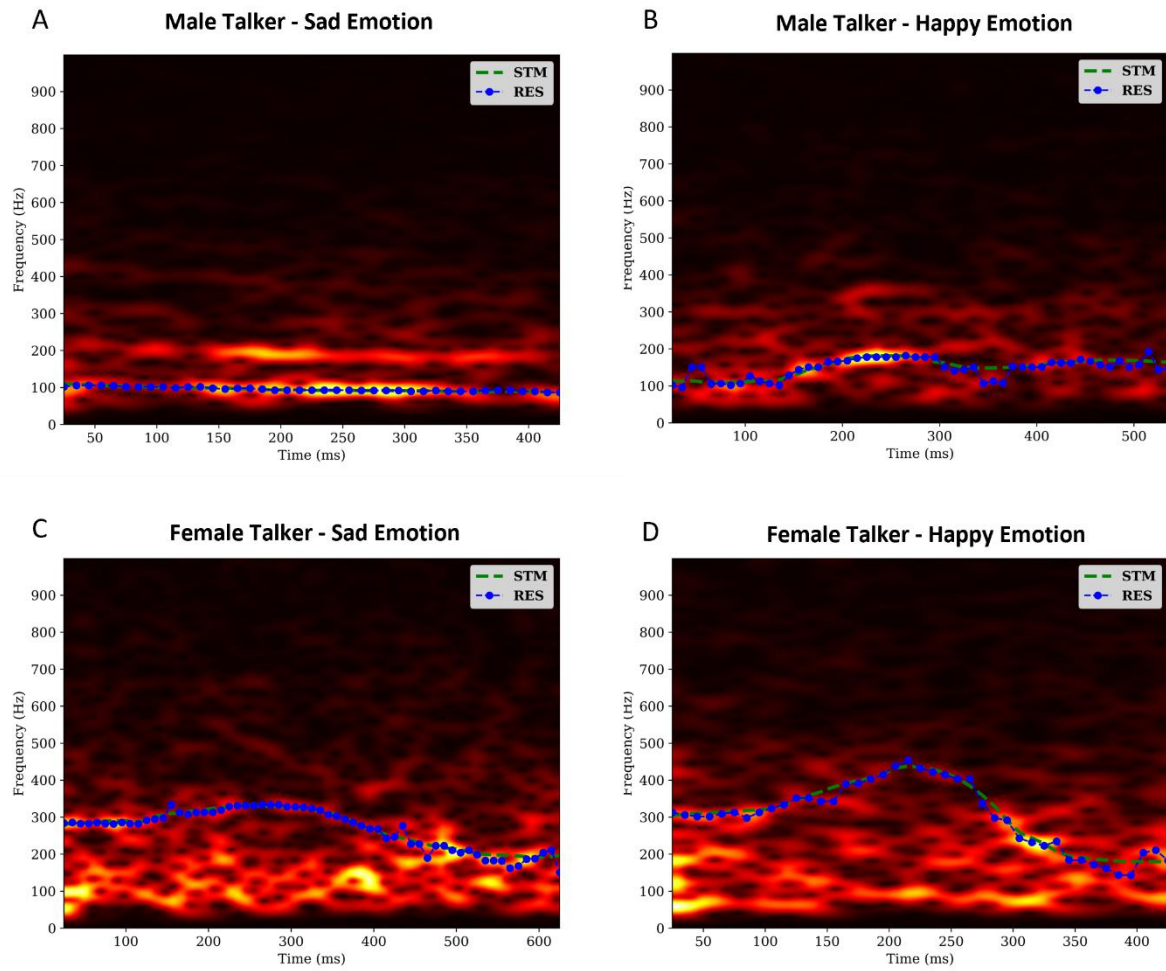

## Participant 13

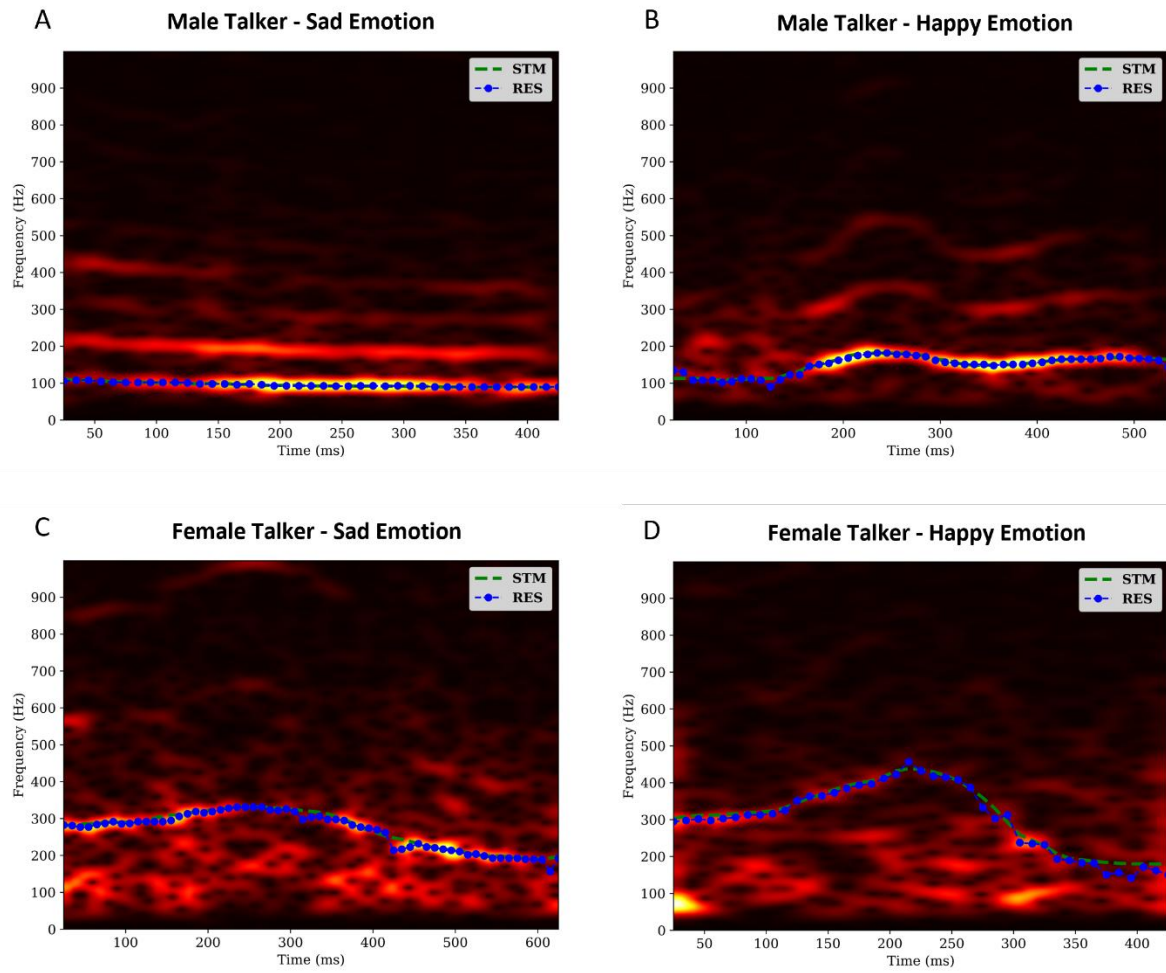

Participant 14

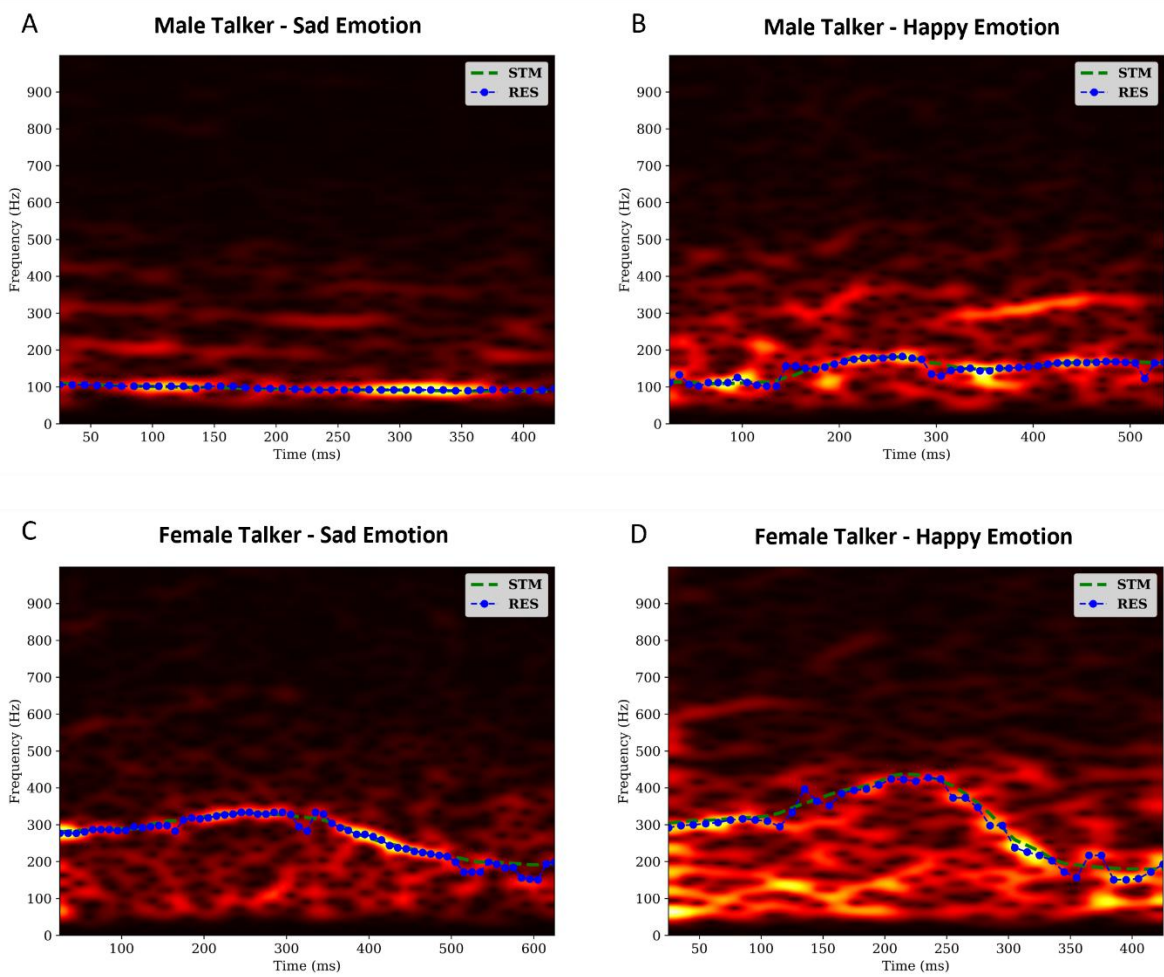

Participant 15

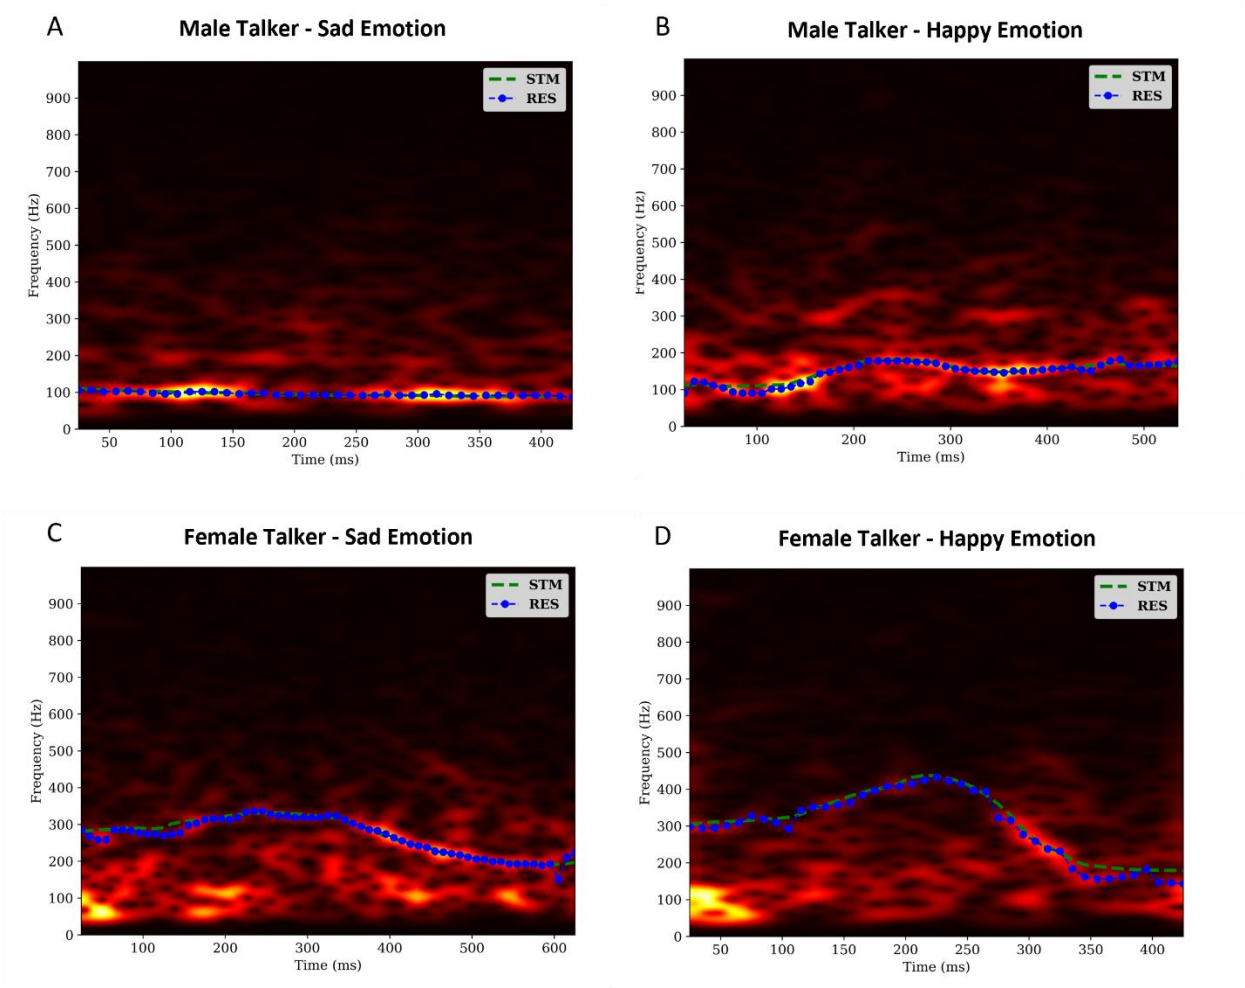

## Participant 16

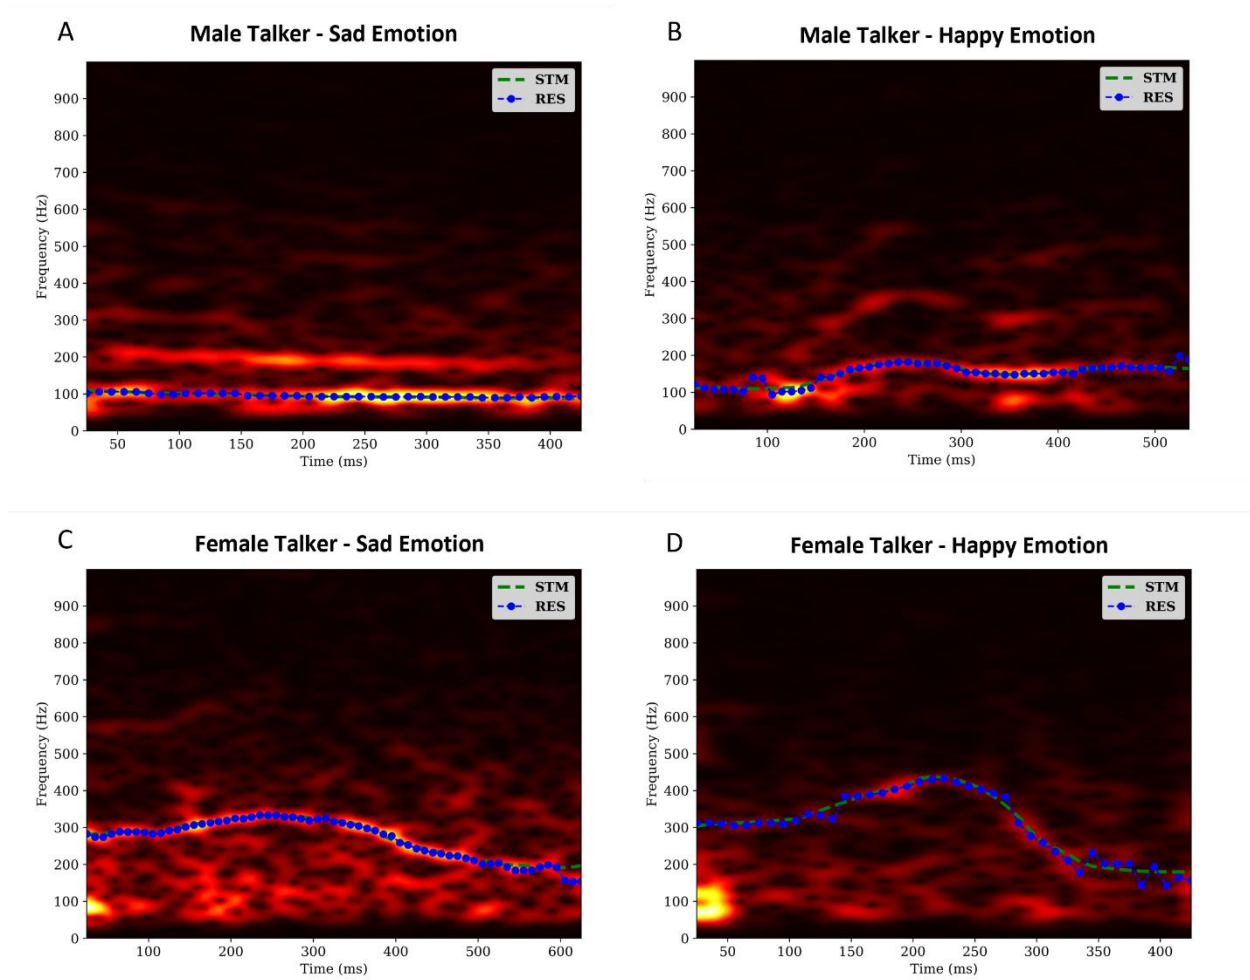

Figure S1. Spectrograms with overlaid F0 contours extracted from the stimulus waveform (green curves) and evoked FFR (blue curves) are shown for each participant ( $n=16$ ) across the four experimental conditions: male talker and sad emotion (A), male talker and happy emotion (B), female talker and sad emotion (C), and female talker and happy emotion (D).
